# Supplementary material for: The Lotus japonicus AFB6 Gene Is Involved in the Auxin Dependent Root Developmental Program
Source: MDPI journal article supplement (doi:10.3390/ijms22168495), 2021-08-06
Supplement: s1 [file s1]

A

MECIRKKESPEPNILNQASP **F**PDEVLERVLGMVKSRRDRSSVSLVCKEWYNAERWSRRS VFIGNCYSVSPEILTRRFNIRSVTLKGKPR **F**SDNLPANWGADI  
RSWL VVFADKYPLLEELRL **K**RMT **V**SDESLEFLALSPYFKALSLLS **C**D**G**FST**D**GLAA**I**ATSCKNLTEDIQENGID **D**KSGNWLSCFPESFTSLEVLNFANLPNDVN  
SDALEKLVSRCCKSLKTLKVNRSVTLEQLQRLLVRAPQLCELGSGSFSEDDLTAAQYSEIESAFNNCKNLHTLSGLWDPAEQYLPLLYPACTNLTFFNLSYAPLDGD  
DLAKLLVHCPNLRRLWVVDTVEDKGLEAVGSHCPLEELRVFPADPFEDAEIGHGVTESGFVALSRGCPRLHYVLYFCRQMTNAAVATVVQNCPDFTHF **R**L**C**IMNP  
GQPDYLTHEPMDEAFGAVVKTC SKLQ**R**LAVSGLLTDLTFEYIGKYAKNLET**L**S**V**AFAGSSDWGMECVLRG**C**PKLR**K****L**EIRDCPFNGAALLSGLERYESMRSLWMSD  
CKLTMNGCRLLAKEMPRLNVEVIKEEGCYEGPAQRVYVYRSVAGPRRDAPSFVLAHCAPHNARGSGKGSTTWSIVCTMQPYLVCMRGYFQNL

B

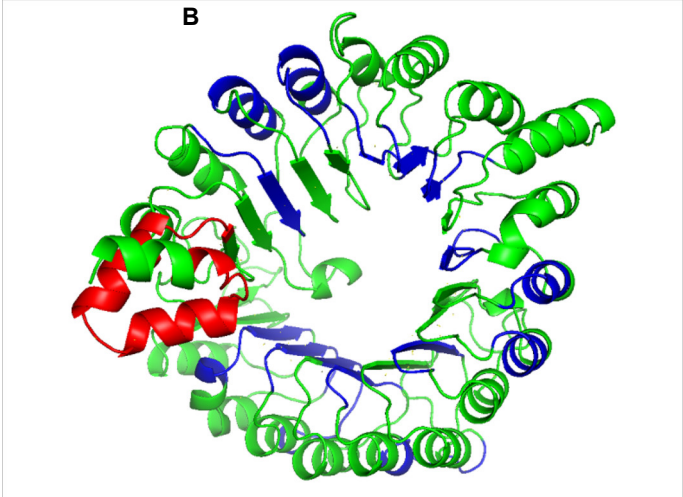

**Figure S1.** (A) The LjAFB6 amino acid sequence. Conserved amino acid residues are highlighted (red, F-box; green, conserved auxin binding residues; blue, residues involved in the oligomerization). (B) Three-dimensional structure model obtained using as template the X-ray structure of *A. thaliana* TIR1 (PDB code:2P1M) [37]. F-box and LRRs are indicated in red and blue, respectively. The model was obtained online at the SWISS MODEL server by using the tools under Deep view Swiss PDB Viewer program (Guex and Peitsch, 1997). The picture was generated by PyMOL program.

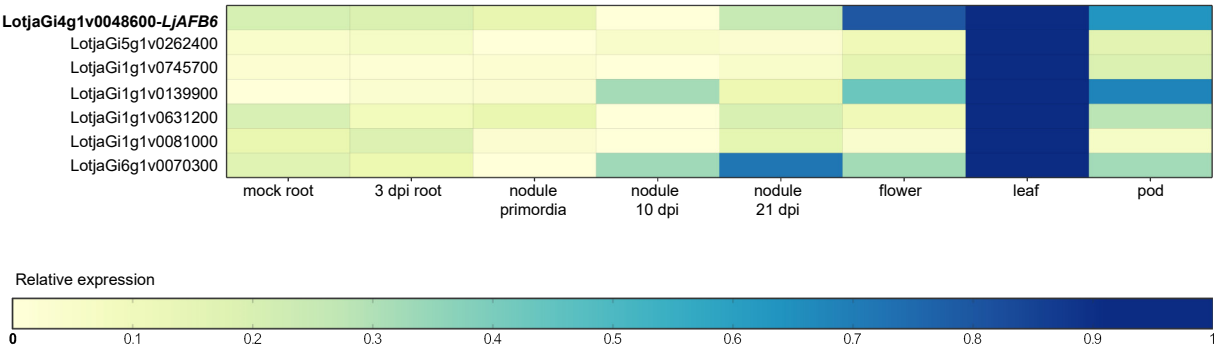

**Figure S2.** Relative expression levels of the TIR1/AFB genes in different organs, normalized to the tissue with the highest transcript abundance. The heatmap was generated using the ExpAt tool available online at <https://lotus.au.dk/expat/> (accessed on 5 May 2021) [38].

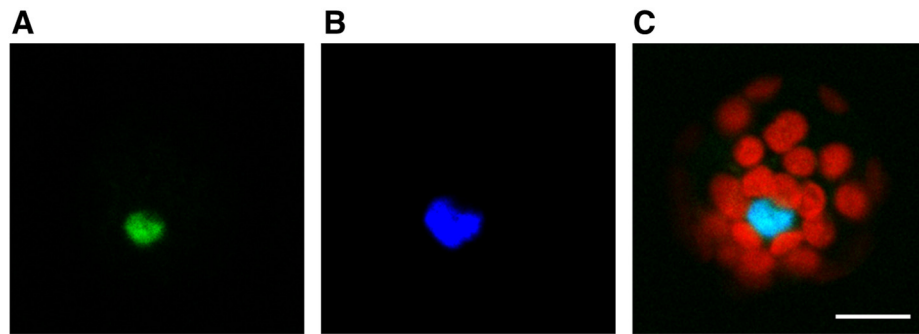

**Figure S3.** *Lotus japonicus* AFB6 localization at the nucleus. The LjAFB6-YFP translational fusion was transiently expressed in protoplast of tobacco mesophyll cells under the control of the 35S promoter. (A) YFP nuclear localization (B) DAPI nuclear localization (C) Merged image of chlorophyll autofluorescence and DAPI-stained nucleus. White bar = 20  $\mu$ m.

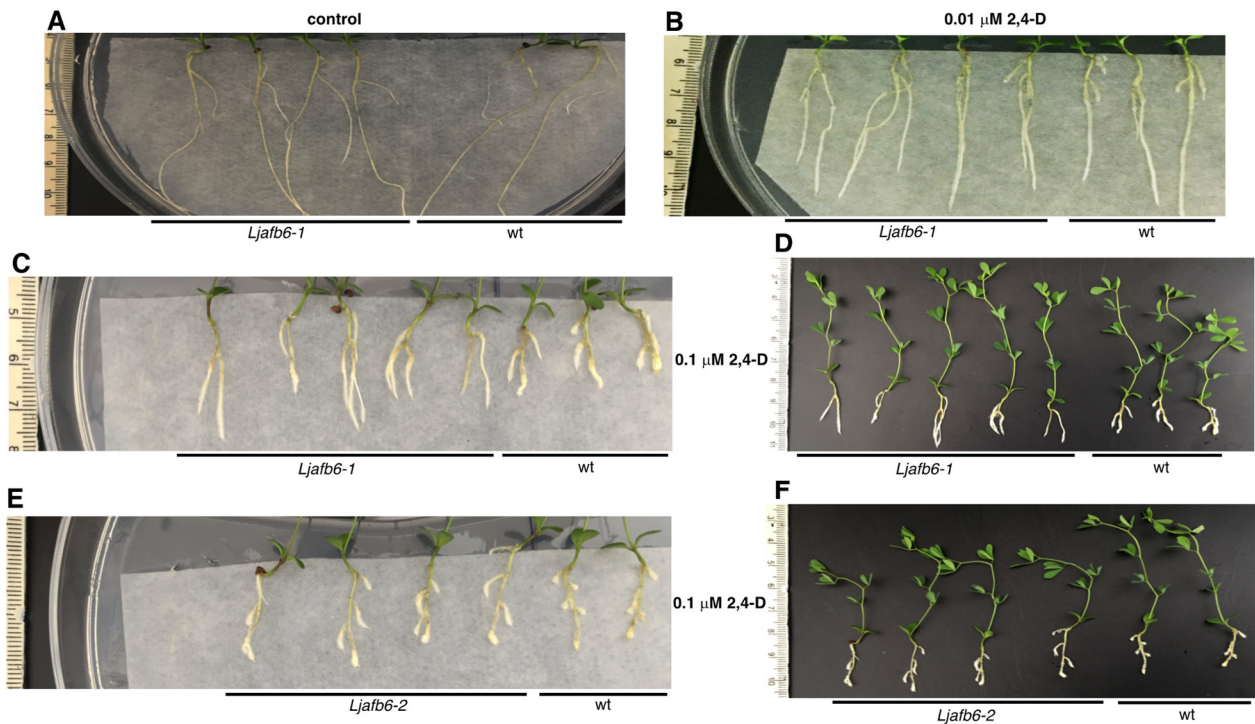

**Figure S4.** Phenotypic characterization of *Ljafb6* plants. Representative images of wild type and *Ljafb6* plants at 20 days after transfer on 2,4-D media. (A) Roots of wild type and *Ljafb6-1* plants grown on B5 Gamborg medium without 2,4-D. (B) Roots of wild type and *Ljafb6-1* grown in the presence of 0.01  $\mu$ M 2,4-D. (C) Roots of wild type and *Ljafb6-1* plants grown in the presence of 0.1  $\mu$ M 2,4-D. (D) Same plants as in C. (E) Roots of wild type and *Ljafb6-2* plants grown in the presence of 0.1  $\mu$ M 2,4-D. (F) Same plants as in E.

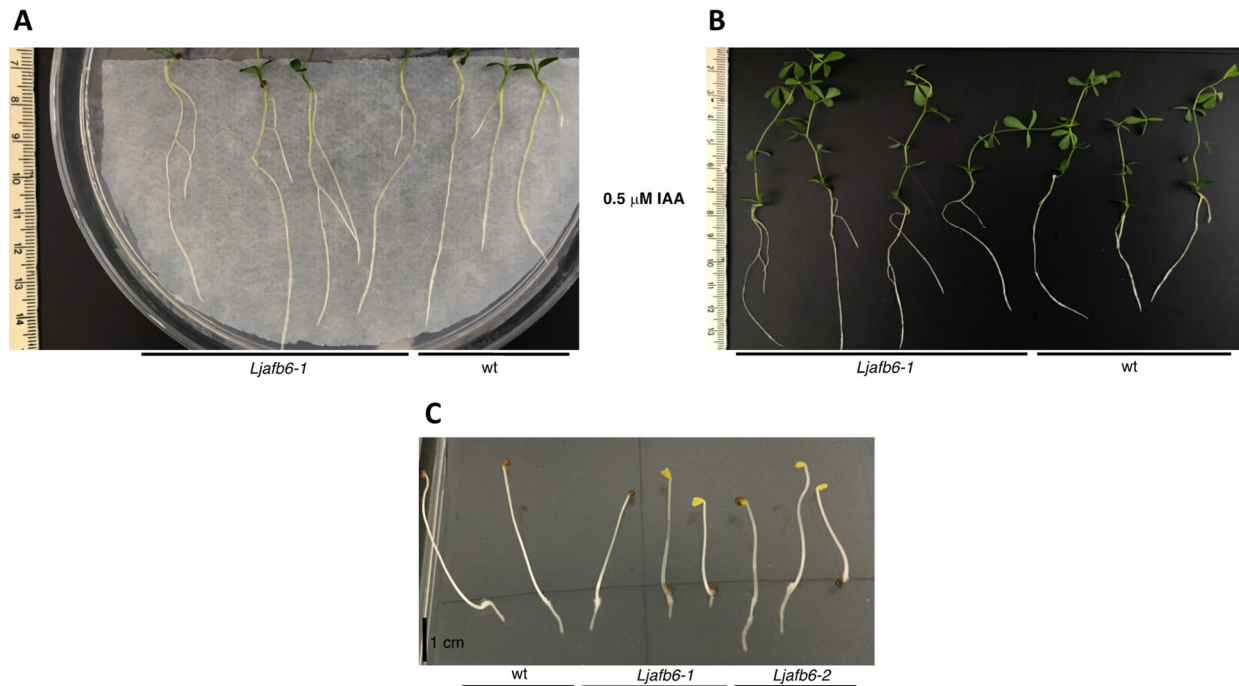

**Figure S5.** Phenotypic characterization of *Ljafb6* plants. **(A)** Representative images of the roots of wild type and *Ljafb6-1* plants at 20 days after transfer on 0.5 μM IAA media. **(B)** Same plants as in A. **(C)** Etiolated wild type and *Ljafb6* seedlings maintained for 2 weeks in the dark. Plant different genotypes are indicated.

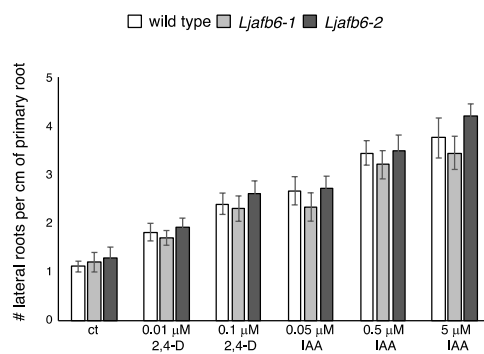

**Figure S6.** Number of lateral roots formed in wild type and *Ljafb6* plants. Plants were scored at 20 days after transfer on media supplemented with IAA. Bars represent means and SE of measures from three experiments (12 plants per experiment per condition).

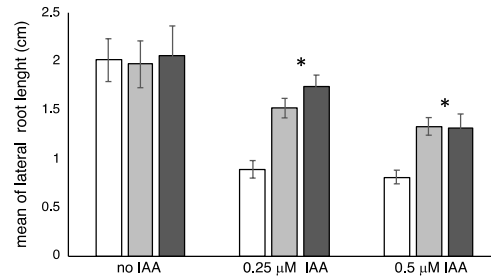

**Figure S7.** Mean of lateral root elongation of inoculated plants. Wild type and *Ljafb6* plants were grown in a B5 derived medium without N sources and inoculated with *M. loti*. Roots length were scored at 3 weeks after inoculation. The different concentrations of IAA are indicated. Bars represent means and SE of measures from three experiments (15 plants per experiment per condition). Asterisks indicate significant differences with wild type measures. \*  $p < 0.001$ .

**Table S1.** List of the *L. japonicus* TIR1/AFB members. Amino acid length and identity values with the *A. thaliana* members are indicated (the significant peaks of identity are highlighted in bold).

| Gene                 | Aa Length | AtTIR1     | AtAFB1 | AtAFB2     | AtAFB3     | AtAFB4 | AtAFB5     | AtCOI1     |
|----------------------|-----------|------------|--------|------------|------------|--------|------------|------------|
| LotjaGi4g1v0048600.1 | 623       | 56%        | 53%    | 54%        | 54%        | 49%    | 49%        | 33%        |
| LotjaGi5g1v0262400.1 | 583       | <b>78%</b> | 67%    | 59%        | 61%        | 49%    | 51%        | 32%        |
| LotjaGi1g1v0745700.1 | 585       | <b>80%</b> | 67%    | 61%        | 60%        | 49%    | 50%        | 32%        |
| LotjaGi1g1v0631200.1 | 572       | 60%        | 56%    | <b>74%</b> | <b>75%</b> | 49%    | 51%        | 32%        |
| LotjaGi1g1v0139900.1 | 631       | 50%        | 49%    | 50%        | 49%        | 67%    | <b>72%</b> | 29%        |
| LotjaGi1g1v0081000.1 | 603       | 35%        | 35%    | 34%        | 34%        | 32%    | 33%        | <b>72%</b> |
| LotjaGi6g1v0070300.1 | 590       | 34%        | 34%    | 34%        | 35%        | 32%    | 34%        | <b>67%</b> |

**Table S2.** Oligonucleotides used in the present work.

|                              |                               |
|------------------------------|-------------------------------|
| Promoter-gusA Fusion         |                               |
| For-GUS- <i>Sal</i> I        | CCGGTCGACATGAGGAGGAAGAAGGCAGG |
| Rev-GUS- <i>Bam</i> HI       | CTAGGATCCAGATTCTTCTTTCTGATCCT |
| LjAFB3-GFP fusion            |                               |
| F-GFP- <i>Bgl</i> II         | GAAGATCTATGGAGTGCAGGATCAGAAAG |
| R-GFP- <i>Kpn</i> I          | GGGGTACCCAGGTTCTGGAAATAGCCTCT |
| qRT-PCR                      |                               |
| F-LotjaGi4g1v0048600(afb3)   | TTATCGTTCTGTTGCTGGCC          |
| R-LotjaGi4g1v0048600.1(afb3) | AGGTTCTGGAAATAGCCTCTCA        |
| F-LotjaGi5g1v0262400         | ACTTCAGGGTGTGCTCCTG           |
| R-LotjaGi5g1v0262400         | TGGGGCACCTACTAACCAAG          |
| F-LotjaGi1g1v0745700         | GTGCAGGAGGAAAGTCTTCG          |
| R-LotjaGi1g1v0745700         | CTCAAGCCAAGGAAAAGCAC          |
| F-LotjaGi1g1v0631200         | ATAACGGTGGCCAAGAAGT           |
| R-LotjaGi1g1v0631200         | GAACACCTGGTCGGTCAACT          |
| F-LotjaGi1g1v0139900         | TCTGGTTTGCTGACTGATCG          |
| R-LotjaGi1g1v0139900         | TTGCAGTTCGACATCCAGAG          |
| LORE1 lines genotyping       |                               |
| Line 30003519                |                               |
| F3519                        | CAACGCTGAGAGATGGTCAAGGAGGA    |
| R3519                        | AGCACCCCCATCAAGCAGGAAACA      |
| Line 30004527                |                               |
| F4527                        | CAGCAGCATTGGTCATCTGACGGC      |
| R4527                        | TGAACTTTGCCAACCTTCCCAATGA     |
| ARF expression               |                               |
| For-IAASynth1                | ACTACACCAGCCCCAATGAG          |
| Rev-IAASynth1                | GGTCCAAGGTGCCTGTTTTA          |
| For-IAASynth2                | GCAATCCCCTCGTTCATCTA          |
| Rev-IAASynth2                | GTTGAATGTCAGGCAGCAGA          |
